# Supplementary material for: New records of theropods from the latest Cretaceous of New Jersey and the Maastrichtian Appalachian fauna
Source: R Soc Open Sci. 2019 Nov 13;6(11):191206. doi: 10.1098/rsos.191206 (PMC6894593; doi:10.1098/rsos.191206)
Supplement: Larson and Currie et al dataset [file rsos191206supp3.xlsx]

## Sheet: Sheet1
NAME	CBL	CH	CBW	MDM	DDM
NJSM GP 22949	8	15	2		5
Tar Heel	11.5	18	5.1	3.4	3.26
s	4.15	5.06	1.64	7	4.75
s	4.23	5.98	1.72	13	6
s	4.57	6.56	1.83	10	5
s	2.08	2.32	1	9	6
s	3.74	5.89	1.72	8	5
s	4.15	6.39	1.76	7	4
s	1.84	2.2	0.84	11	6
s	3.49	5.48	1.76	9.5	6
s	2.49	4.81	1.28	9	5
s	3.15	5.4	1.44	7	5.75
s	2.64	3.4	1.16	8	5
s	3.4	4.98	1.48	8	5
s	2.74	4.4	1.1	8.2	6.3
s	2.4	3.4	1.26	8.5	5.25
s	4.32	6.47	1.66	6.3	4.5
s	3.15	3.98	1.3	9.5	5.5
s	4.07	7.22	1.62	6.5	5
s	3.57	4.48	1.52	8	5
s	4.4	6.89	1.68	11	5.5
s	3.9	5.48	1.76	10	5
s	4.23	4.48	1.88	8	4.3
s	2.72	3.72	1.1	8.6	5.25
s	2.74	5.06	1.12	10	6.5
s	2.91	4.9	1.12	8	5.75
s	3.08	3.24	1.24	7.6	4.6
s	2.44	3.6	1.12	9	6.5
s	3.12	3.76	1.18	9	6
s	2.8	3.12	1.32	10	5.5
s	2.4	2.68	1.18	0	5.7
s	3.07	5.15	1.56	10	5.25
s	2.84	3.32	1.42	6.6	5
s	4.81	7.47	1.82	7	5
s	3.57	6.06	1.86	?	5.5
s	3.9	5.81	1.68	?	4.75
s	3.24	4.15	1.24	9	5
s	2.4	3.4	1.02	8.5	5.6
s	1.76	2	0.84	11	6
s	2.36	3.16	1.06	?	7
s	2.08	2.52	0.88	10	8
s	2	2.72	0.86	8	8
s	1.64	2.28	0.8	10	8
s	3.98	6.64	2.12	5.2	4.3
s	2.28	2.64	1.16	6.8	4.5
s	2.36	2.52	1.1	8	5.7
s	2.66	4.15	1.12	8.2	6.2
s	2.16	3.57	1.14	?	6.2
s	2.91	3.82	1.32	?	5.6
s	2.57	3.82	1.2	9	7.2
s	2.16	4.23	1.02		6.6
s	3.74	5.56	1.52	8.2	5.5
s	3.07	5.06	1.44	9	6
s	4.15	7.3	1.76	6.5	4.8
s	2.83	3.4	1.12	9	6.2
s	3.11	4.48	1.32	6.6	5.1
s	2.91	3.9	1.36	7	5
s	2.24	2.49	0.96	10	6.5
s	2.57	4.07	1.3	8.8	5.9
s	3.07	4.73	1.42	8.8	5.2
s	4.32	5.81	1.9	6.5	4.4
s	3.24	5.06	1.28	10.3	5.4
s	3.4	4.9	1.58	8	5.3
s	2.49	4.77	1.26	?	6
s	2.91	5.23	1.46	11.5	5.9
s	2.74	4.57	1.26	10.6	5.3
s	4.32	6.47	1.44	8.1	5.4
s	3.74	5.23	1.76	8	5.4
s	2.91	3.4	1.24	8.5	5.1
s	4.15	6.31	1.8	7.4	4.9
s	3.57	6.23	1.6	10.6	4.7
s	2.32	3.49	1.16	9	6
s	2.36	2.76	0.94	9.7	5.8
s	3.9	7.22	1.6	?	5.2
s	3.4	4.98	1.4	9.2	5.9
s	4.57	6.64	1.92	8	4.5
s	4.23	7.55	1.64	7.7	5.5
s	4.4	6.14	1.92	6.3	5
s	2.28	2.76	1.08	7	4.8
s	2.57	4.65	1.48	?	6.3
s	2.16	3.57	1.26	?	5.7
s	2.49	5.06	1.28	7.14	5.2
s	2.16	3.86	1.26	?	5.5
s	2.82	3.61	1.24	8.2	6.3
s	2.91	4.07	1.26	11	5.5
s	3.49	5.19	1.46	8.2	5.2
s	2.4	2.88	0.9	8	7.8
s	2.52	2.88	1	?	6.6
s	2.6	2.94	1.04	8.5	6.2
s	1.96	2.48	0.8	11.6	5.7
s	3.57	5.48	1.38	8.8	5.5
s	3.07	4.23	1.24	7.9	5.4
s	3.98	5.23	1.62	9	4.7
s	4.48	7.06	1.7	8.2	5.2
s	3.9	6.39	1.8	7.7	4.8
s	3.07	5.31	1.52	?	5.1
s	2.74	4.07	1.1	11	6.1
s	2.32	3.82	0.94	10	6.7
s	3.49	5.98	1.74	?	5.6
s	4.19	6.81	1.82	7	4.5
s	3.9	6.14	1.62	8.1	5.3
s	4.15	8.38	1.8	6.8	5.1
s	4.57	6.31	1.76	6.7	4.5
s	3.98	6.72	1.66	?	4.9
s	3.98	6.72	1.66	7.6	5
s	4.07	6.14	1.7	6.5	5
s	3.65	5.56	1.52	7.7	5
s	2.49	2.66	1.36	?	5.8
s	3.74	6.56	1.32	?	5.5
s	3.32	5.64	1.38	?	5.7
s	2.91	5.48	1.26	?	5.5
s	3.82	5.06	1.74	7.2	4.3
s	2.57	3.28	1.08	8.8	6.1
s	2.16	3.24	0.98	9.7	5.4
s	2.82	3.32	1.3	8	5.5
s	2.41	3.61	0.98	9.3	6.1
s	1.91	3.65	1.02		8
s	2.41	2.49	1.16	8.2	5.9
s	2.45	2.66	1.16	?	7.5
s	4.07	5.31	1.6	?	4.7
s	3.98	6.56	1.82	7.25	4.75
s	3.15	4.07	1.16	9	5.5
s	2.32	3.24	1.04	9.5	6.15
s	2.57	3.82	1.06	9.2	6.75
s	3.15	4.15	1.4	8.75	5.75
s	2.49	4.15	1.06	9	6
s	4.9	7.3	1.64	9	5.5
s	2.74	3.74	1.06	11.5	6.2
s	3.57	5.81	1.46	?	5.5
s	3.9	6.23	1.76	10	4.76
s	3.65	6.23	1.52	8.5	5.5
s	3.57	5.23	1.66	?	5.3
s	3.65	4.57	1.64	9.5	5.1
s	3.07	5.48	1.52	?	5.6
s	3.57	4.81	1.38	7.5	4.3
s	4.15	5.64	1.74	8	5
s	3.4	5.48	1.64	?	5.2
s	3.98	5.48	1.68	7.7	5.3
s	3.98	6.89	1.88	10	5.6
s	3.57	6.47	1.52	?	4.8
s	3.07	3.4	1.36	9	5
s	3.3	5.2	1.2	11	5.5
s	2.8	4.7	1.1	8.5	6
s	3.7	4.5	1.5	7.5	5
s	3.5	4.1	1.6	8	5
s	3.3	4.3	1.4	6.5	4.5
s	2	2.1	1.1	?	7
s	2.2	2.84	1.02	8	7
s	3.7	6.8	1.5	9	6
s	2.1	3.4	1.1	10	7
s	2.64	3.48	1	?	7.5
s	3.74	5.94	1.42	9.5	6
s	3.07	4.73	1.08	?	5.6
s	2.57	3.15	1.16	15	6
s	3.82	6.14	1.48	6.2	4.9
s	3.15	5.73	1.56	?	5.5
s	1.64	1.88	0.72	10	7
s	2.16	3.82	1.44	?	6.1
s	2.44	3.28	1.12	7.7	6.1
s	4.4	6.39	2.04	5.2	4.5
s	4.65	6.97	1.94	6	4.3
s	3.74	4.69	1.56	7	5
s	3.49	6.47	1.6	?	5.2
s	3.4	6.31	1.72	7.8	5
s	3.4	4.48	1.36	6.2	4.8
s	2.32	2.74	1.04	8.7	4.6
s	3.15	3.32	1.36	5.5	4.7
s	2.32	2.66	1.18	10.8	4.7
s	4.07	5.98	1.54	8	5.6
s	3.2	4.32	1.3	7.7	5.6
s	2.57	2.99	1.12	11.5	6
s	2.32	3.07	1.02	11	6
s	2.57	2.82	1.02	10	6
s	1.91	2.57	0.9	12.4	6
s	4.48	5.77	1.8	7.4	5.1
s	2.57	3.69	1.28	8	6
s	3.74	4.81	1.36	?	6
s	2.99	3.9	1.26	9	5.1
s	2.49	3.49	1.02	8.8	6
s	1.74	3.32	0.92	?	7.1
s	3.9	4.98	1.64	7.5	4.6
s	4.07	8.13	1.72	6.2	4.8
s	3.4	4.57	1.58	8.3	4.9
s	3.15	3.49	1.4	?	5
s	3.65	5.23	1.6	7.8	5.2
s	4.48	5.89	1.82	8	4.9
s	5.2	7.1	2.3	5.6	4.6
s	2.66	5.06	1.62	9	6
s	2.99	5.23	1.5	7	5.25
s	3.15	5.98	1.56	7	5.2
s	2.41	4.07	1.48	?	5
s	3.07	4.9	1.62	6.66	5.2
s	3.07	5.56	1.78	?	5.1
s	2.1	3.4	0.9	?	7
s	2.1	3.5	0.7	?	5
s	2.8	6.5	1.4	?	4.5
s	3.4	8.1	1.9	?	4.25
s	4.2	8.5	2	?	4.5
s	4.4	8.5	1.9	?	4
s	2.9	6	1.5	?	4
s	1.9	4.7	1	?	5.5
s	5	12.5	2.2	?	4
s	5	13.5	2.2	?	4.5
s	6	12	2.9	?	4
s	5.3	11.3	3.2	?	3.75
s	6.9	13	3.1	?	4
s	2	5	1.1	?	5
s	4.4	10.3	2.3	?	4
s	5.1	9	2.3	6	4
s	4.96	7.89	2.48	6.2	5.26
s	3.8	7.91	2.25	?	3.88
s	5.08	9	2.14	5.98	3.9
s	5.28	9.08	2.13	6.14	5.06
s	4.2	8.5	2.3	6.5	4
s	4	7.9	2	7.1	4.4
s	2.7	4.2	1.1	?	6.5
s	2	4.6	1	?	6
s	2.4	4.8	1.1	?	5.5
s	2.2	4.1	0.7	?	7
s	4.6	6.7	1.7	?	5
s	3.7	6.7	1.8	?	4.25
s	1.9	2.8	0.7	?	6.5
s	2.4	3.9	0.9	?	6.5
s	1.9	5	1	?	5
s	4.2	6.3	1.5	?	4.5
s	3.9	9	1.9	?	4.25
s	4.3	11.2	2	?	5
s	4	9.9	2.1	?	4
s	5.5	13	2.2	?	4
s	3.8	8.2	1.4	?	5
s	4.9	9.6	2.2	?	4
s	5	13	2.3	?	4
s	5.4	13	2.5	?	4
s	5.9	13	2.8	?	3.75
s	5	12	2.1	?	5
s	5.3	11.8	2.3	?	4.25
s	4.5	7.8	1.8	?	4.75
s	4.2	7.5	1.7	?	4
s	4.9	9.6	2.2	?	4
s	5.1	9.5	2.1	?	4
s	5	9.2	2.3	?	4
s	4.9	10.5	2.1	?	4
s	4.7	10.4	2.2	?	4.25
s	4.2	8	1.5	?	4.5
s	4.2	10.5	2.5	?	3.75
s	4.7	10.3	2	?	5
s	5.9	13	2.7	?	4
s	4.8	9.2	2	?	4
s	5.1	11.7	2.1	?	5
s	4.5	9.5	2.4	?	4
s	5.7	11.2	2.1	?	4.5
s	4.8	9.4	2.2	?	4
s	5.5	11.2	3.2	?	5
s	5.6	10.8	2.6	?	4
s	7.9	16	2.8	?	3.75
s	5.5	14	2.7	?	4.25
s	5.1	9	2.2	?	5.5
s	6.4	13	2.6	?	3.75
s	5	9	1.9	?	4.25
s	5.3	9	2.1	?	4
s	3.5	7.6	1.7	?	4
s	3.7	8.3	1.9	?	4
s	4.7	9.2	2.4	?	3.75
s	3.8	8.7	1.6	?	6
s	5.6	6.3	1.4	?	4.75
s	4.2	8.1	2	?	4.25
s	5.5	11.5	2.2	?	4.25
s	5.2	8.2	2.2	?	4.25
s	3.5	7.5	1.9	?	4.25
s	4.1	9.5	2.6	?	4.5
s	4.1	9.5	2.4	?	4
s	5.3	11.8	2.5	?	4.75
s	5	10.5	2.4	?	4
s	6	13	2.3	?	3.5
s	5.7	11	2.2	?	3.75
s	3.5	7.8	2	?	3.75
s	2.9	7	1.7	?	4.5
s	5	12	2.3	?	4
s	5.1	10.2	2.4	?	4
s	3.8	6.3	1.6	?	4.5
s	4.9	9.4	2.2	?	5.25
s	3.3	6.2	1.5	?	4.25
s	5.7	11.2	2.4	?	4.5
s	6.3	14.2	2.4	?	4
s	4	9	?	7	4.2
s	4.1	8	?	7.2	4
s	5.1	9	2.2	6.4	4.2
s	3.7	5	?	6	4
s	2.1	3	?	0	6
s	4.3	7	?	8	4
s	5.1	9	?	6.4	4.6
s	3.1	5	?	9	5
s	5.9	10		5	4.2
s	5.3	9	?	5	4
s	5.15	9.55	?	6.12	4.54
s	5.7	10.97	?	?	4.34
s	5.1	7.54	?	5.98	4.72
s	4.69	8.01	2.28	6.86	3.58
s	5.98	11.66	2.48	5.84	4.58
s	5.77	11.25	2.49	?	5.54
s	4.36	9.2	2.45	?	4.28
s	4.89	8.74	2.45	5.5	3.82
s	4.26	7.19	1.98	7.02	4.32
s	5.26	10.78	2.37	5.18	3.78
s	3.93	5.66	1.81	?	4.38
s	5.24	10.8	2.77	?	4.04
s	5.74	11.6	2.67	?	4.28
s	3.67	4.42	1.61	?	3.68
s	5.12	8.18	2.37	6.1	4.06
s	5.42	9.21	2.37	6.18	4.2
s	6.53	9.66	3.73	6.1	3.58
s	4.7	7.67	2.17	8.42	4.34
s	5.6	8.31	2.45	8.64	5.44
s	5.62	10.04	2.37	?	4.04
s	4.33	9.2		4.78	3.54
s	5.77	11.03	2.41	6.88	4.5
s	5.79	11.54	3.16	?	3.82
s	4.66	10.1	2.57	?	4.8
s	4.75	7.58	2.38	4.88	4.3
s	7.5	12.85	3.68	?	4.9
s	7.07	8.38	3.13	?	5.36
s	5.34	10.1	2.82	?	3.88
s	3.82	7.52	1.75	8.34	6.1
s	1.69	2.2	0.83	6.12	5.42
s	2.37	5.33	1.41	?	5
s	2.34	5.01	1.41	?	4
s	2.08	4.82	1.4	?	6
s	2.37	4.91	1.61	?	6
s	2.47	5.58	1.24	?	4.8
s	2.61	5.99	1.41	?	5
s	2.35	5.86	1.2	?	4.84
s	2.54	4.62	0.99	?	6.5
s	3.22	5.66	1.37	?	4.74
s	2.15	4.03	1.57	?	5
s	4	5.3	2	?	4.5
s	4.8	7.2	2.5	?	6.5
s	3.7	5.2	1.6	?	5
s	2.3	2.8	1.4	?	5
s	2	2.2	1.1	?	6
s	2.8	4	1.2	?	6
s	1.8	2.2	0.8	?	7
s	4	6.2	1.8	?	9
s	4	5.5	1.9	?	5
s	8.3	15	5.8	?	5
s	7	10	3.5	?	3.5
s	2	3	1.2	?	4.5
s	3.6	5.5	3.2	?	6.5
a	5	10	3.5	2.7	2.3
a	6.1	13	?	6	4
a	6.6	15.3	?	5	4
a	5.5	11.9	?	6	4
a	5.6	7.8	?	7	4
a	5.6	10.5	?	5.5	4
a	4.4	7	?	8	4.5
a	5.5	12	3.5	3.5	3
a	3.2	5.7	?	6	5
a	5.5	11.3	?	5.5	4
a	5.2	7.5	2.8	5	4
a	5.2	7	2.6	8	4
a	4.98	7.68	2.48	3.1	2.8
a	5.15	8.38	2.4	5.2	3.2
a	5.81	9.12	2.88	5	3.2
a	5.23	9.36	2.76	2.9	2.8
a	4.73	7.55	2.4	5.1	3.5
a	4.65	6.64	2.36	5.8	3.05
a	5.06	9.6	2.56	5	3.4
a	3.15	4.07	1.58	5.2	3
a	3.24	5.06	1.72	5	3
a	5.48	9.52	2.56	5.4	3.5
a	4.32	5.48	1.88	7.7	4.7
a	4.48	7.3	2.32	5.2	3.5
a	5.6	8	2.6	5.1	3.3
a	4.73	7.22	2.56	0	3.7
a	4.07	6.39	1.99	5.7	3.5
a	3.9	5.81	2.08	5.4	4
a	4.9	10.15	2.41	4.5	3.1
a	4.65	7.06	?	6	4
a	4.23	6.56	2.16	4.6	4
s	2.5	5	?	?	6
s	4.5	8	?	?	5
s	2.2	4	?	?	6
s	3	4.5	?	?	7
s	4	7	?	?	6
s	7	17	?	?	4.5
s	6.81	13.89	2.72	5.44	4.16
s	2.88	6.48	?	?	4.96
s	5.07	7.24	2.32	?	4.5
s	5.72	8.7	2.57	?	4.28
s	5.62	11.18	2.68	?	4.68
s	5.77	10.15	2.6	?	4.06
s	6.32	9.28	2.74	5.02	3.82
s	5.4	9.41	2.81		3.96
s	5.6	8.55	2.42	5.98	4.5
s	5.6	7.8	2.89	?	3.96
s	6.7	8.48	2.83	5.74	4.28
s	5.8	10.34	3.1	?	3.84
s	6.13	9.7	2.54	5.1	4.34
s	5.5	8.35	2.34	8.82	5
s	7.12	10.8	3.5	5.82	3.52
s	5.7	8.49	2.22	?	4.54
s	5.49	7.36	2.6	7.74	4
s	4.73	6.83	1.89	7.38	5.16
s	4.78	7.02	2.04	6.66	4.16
s	5.52	10.6	3.02	?	4.54
s	6.25	13.16	3.63	?	3.64
s	3.48	6.87	2.17	?	4.58
s	4.08	7.99	1.56	?	5
s	4.05	7.69	2.55	?	4.32
s	4.48	10.73	3.08	?	4.76
s	3.14	7.73	2.01	?	5.1
s	4.99	8.85	2.19	?	4.48
s	4.42	7.8	?	?	4.72
s	4.84	6.45	2.07	?	4.96
s	4	7	?	?	4
s	4	9	?	?	4.5
s	6	12	?	?	4
s	5	8	?	?	5
s	3.6	8	?	?	5
s	3.2	7	?	?	5.5
s	3.7	10	?	?	5
s	5.8	13	?	?	5
s	3	6	?	?	7
s	3.5	6	?	?	6
s	3.2	5.5	?	?	6
s	3.3	5	?	?	5.5
s	3.4	5	?	?	5.5
s	4	8	?	?	6
s	3	5	?	?	6
s	2.5	4.5	?	?	6.5
s	3	4	?	?	6
s	3	5	?	?	5
s	2.3	4	?	?	8
s	5	8	?	?	5
s	6	12	?	?	4.5
s	5	12	?	?	4
s	5	8	?	?	5
s	4	6	?	?	7
s	6	12	?	?	5
s	4	7	?	?	5.5
s	3	6	?	?	6
s	5	8	?	?	6
s	3.4	5	?	?	4.5
s	2.2	3.5	?	?	7
s	3.5	5.5	?	?	5.5
s	3.6	5	?	?	5.5
s	2.6	4	?	?	7
s	2.6	4	?	?	6
s	3	5	?	?	7
s	3.2	8	?	?	5
s	4	7	?	?	6
s	6	15	?	?	4
s	9	17	?	?	4
s	4.5	7	?	?	4.48
s	9	17	?	?	3.5
s	5	10	?	?	4.5
s	3.6	10	?	?	4.5
s	4.5	9	?	?	5
s	7	13	?	?	4
s	6	10	?	?	3.5
s	6	10	?	?	4
s	7	13	?	?	4
s	2.8	7	?	?	5
s	7	13	?	?	4
d	5.43	8.58	3.08	7	4
d	3.82	4.57	2.36	4	3.6
d	2.04	2.12	1.06	3	4
d	7.53	9.98	3.84	6	3.5
d	8.75	17.33	4.07	3.5	3
d	7.88	14	4.9	4	3.5
d	3.82	4.15	1.86	8.8	4
d	5.81	6.39	3.04	5.5	4
d	4.32	5.23	2.4	6	5
d	5.48	11.55	3.4		4.1
d	2.16	4.9	1.52	?	4.4
d	4.32	7.06	1.88	9.4	4.6
d	4.15	4.73	1.88	?	5
d	3.74	4.07	1.52	7.5	4.5
d	4.9	7.39	1.96	7	5
d	3.32	6.64	1.62	?	5
d	3.74	5.06	1.56	6.5	4.5
d	6.3	9.1	2.8	5	4
d	5.31	5.64	2.44	7	4.3
d	8.58	15.93	5.06	5	4
d	4.32	4.9	2.36	5.5	4.6
d	3.49	4.73	1.6	7.4	4.5
d	4.73	8.05	3	?	5
d	2.3	3.4	1.2	8	5
d	7.53	8.23	4.23	4.3	3.8
d	8.75	11.38	6.56	?	4.6
d	3.07	5.31	1.7	?	5.1
d	3.4	6.97	1.78	7	5
d	5.6	9.5	3	5	3.7
d	2.66	4.98	2.32	?	4.6
d	2.66	3.82	2.2	?	4.1
d	2.74	5.73	2	6	4.25
d	3.97	4.44	2.15	7	5.1
d	3.9	8.5	2.3	?	4
d	4.5	11.5	2.9	?	3.26
d	4.7	11	2.8	?	3.5
d	5.9	10.5	3.9	?	4
d	5.3	14.5	4.2	?	3.5
d	5.7	9.5	3.9	?	3.5
d	7.21	12.86	4.06	2.76	3.4
d	6.84	11.58	3.7	3	3
d	7.64	12.38	4.02	3.16	3.5
d	6.28	10.68	3.13	1.76	3
d	6.69	10.98	3.32	3	3.26
d	5.7	9.7	3.11	3.5	4.5
d	5.46	9.4	4.03	3	5
d	6.09	11.55	3.81	2.76	3
d	6.47	11.22	3.91	3	3.5
d	6.56	11.27	3.89	3	3.5
d	5.56	8.52	3.27	3.4	3.5
d	3.6	6.4	2.3	?	5
d	4.1	9	2.8	?	4
d	4.3	9.8	2.7	?	3
d	4.9	8.5	2.7	?	3.5
d	5	10	3.2	?	3
d	5	11.4	3.5	?	3.5
d	5.1	10.8	3.1	?	3.25
d	5.2	9.5	3.1	3.04	3
d	5.4	11	3.2	3.96	3.5
d	5.4	10.5	2.9	?	3.5
d	5.5	11.5	3.7	?	3.5
d	5.5	12.3	3.7	?	4
d	6.2	14	3.5	?	4
d	5.7	14	3.3	3.72	3.25
d	6.1	13	3.9	?	3.5
d	7.1	13.5	4	?	3.5
d	7	13.5	4.5	?	3
d	6.4	11	4	?	3.25
d	7.8	13.2	4.1	?	3
d	6	12	3.2	3.48	3.5
d	6	14.5	3.5	?	4.5
d	6	13.5	3.7	?	3.25
d	7.9	17.2	5.1	?	3.5
d	7.9	14.5	4	?	3.25
d	6.1	13	3.7	?	3
d	5.4	16.5	4	?	3
d	6.5	13.5	3.7	?	3.5
d	6.5	13	4	?	3.75
d	7.2	15.5	3.9	?	3.75
d	7.1	15.5	4.3	?	3
d	6.4	12.5	4.3	?	3.75
d	5.6	12	3.9	?	3
d	6.3	10.5	3.6	?	3
d	6.1	10.5	3.3	?	5
d	6.3	13.5	3.9	?	3.25
d	6.8	13	3.3	?	3.75
d	4.2	8.8	2.7	?	3
d	5.5	13	3.9	?	3
d	4	10.5	3	?	3
d	3.5	7.8	2.7	?	3.5
d	5	11	4.1	?	3.25
d	4.9	11	3.5	?	4
d	3.8	6.5	2	?	4.5
d	5.5	12	3.4	?	3.25
d	4.9	9.8	2.5	?	3.25
d	3.8	8	2.8	?	3.5
d	4.1	10	2.5	?	3.5
d	5.8	10.7	3.9	?	3
d	3.8	9.2	2.9	?	3
d	5.1	11	4.2	?	3.5
d	4.3	10.5	3.1	?	3.5
d	3	7.3	2.1	?	4
d	6	13	4.6	?	3
d	6.2	11	?	3.4	3.6
d	7	1	?	3	2.8
d	7.8	12	4.2	3.4	3
d	7.1	11	?	3.2	3
d	6	12	?	3.2	3
d	6.2	9	?	3.2	3.2
d	7.9	19	?	3.6	3.2
d	7.4	14	?	4	3.4
d	5.04	9.04	3.12	?	5.02
d	5.16	10.96	2.96	2.84	3.04
d	5.04	10.31		2.56	2.84
d	7.3	12.52	4.53	3.04	2.94
d	7.39	8.88	3.44	4.4	4
d	4.73	9.28	3	2.8	3
d	4.81	11.2	4.03	4.9	5
d	5.43	9.63	2.49	4	4
d	4.57	6.56	1.99	4.3	4.3
d	5.95	9.63	3.15	5	3.3
d	7.7	11.73	4.03	4	3.5
d	6.56	9.98	2.82	4.5	3.8
d	6.48	9.63	2.91	?	4
d	6.13	11.03	3.4	3.8	3.2
d	7.88	16.63	4.73	4	3
d	6.65	11.2	3.32	4.3	3.6
d	7.44	11.76	4.06	4.1	3.1
d	6.56	9.92	3.2	4.3	3.5
d	5.4	8.8	3	3.8	3.4
d	3.57	8.16	2.44	0	3.8
z	2.44	4.73	2.04	?	4
z	3.32	5.31	1.8	7	4.5
z	4.07	7.06	1.64	?	4.3
z	4.9	8.22	2.4	?	4.1
z	2.91	5.64	2.16	?	4.1
z	2.74	5.31	2.28	?	4.7
z	2.08	4.81	1.96	?	4.86
z	2.24	4.98	1.74	?	5.2
z	2.82	5.81	2.16	?	4.3
z	2.99	5.23	2.28	?	4.8
z	2.32	4.23	1.58	?	4.9
z	6.5	12	3	?	3.03
z	6.1	10	2.4	?	3.25
z	6.3	11	3.2	?	3.5
z	5.7	12.5	2.5	?	3.5
z	5.8	13	2.5	?	3.5
z	7.2	15	3.2	?	3
z	5.4	10.5	2.5	?	3.5
z	6.5	13	3	?	3.25
z	7.9	14	3.1	?	3.25
z	6.6	15.5	3	?	3.25
z	6.4	11.5	3.1	?	3.25
z	5.8	11	2.5	?	3.75
z	6.3	12	3.4	?	3.5
z	6.3	15.5	3	?	3
z	6	12.5	3	?	3.25
z	6.4	12	3	?	3
z	6.3	11.2	2.4	?	3.5
z	6.4	11.7	3	?	3.25
z	7	12	3	?	3
z	6.8	13.7	3.3	?	3
z	5.3	9.3	2.1	?	3.25
z	5.8	11.5	2.6	?	3.5
z	5	11	2.3	?	3.5
z	6.4	14	2.5	?	3
t	4.92	7.22	2.43	3.76	2.25
t	6.22	9.61	2.95	2	2
t	6	9.39	3.03	2	1.75
t	5.6	8.47	2.71	2	2.5
t	5.2	7.84	2.33	2.5	2.5
t	4.45	7.25	1.62	2.5	2.5
t	5.7	8.7	2.6	2.2	2.4
t	5.2	9	?	1.5	1.5
t	5	7	?	1.42	1.62
t	5.2	9	?	1.5	1.66
t	5.7	8	?	1.42	1.36
t	4.8	9	?	1.54	1.66
t	5.1	8	?	1.88	1.94
t	4.3	8	?	1.08	1.42
t	6.2	9	3.4	0.94	1.56
t	5.9	8	?	1.86	1.66
t	5.6	8	?	2.14	1.88
t	4.51	6.67	2.22	2.4	2.24
t	4.96	8.61	2.55	2	1.78
t	5.35	8.01	2.65	?	2.16
t	4.99	6.92	2.81	1.84	2
t	2.97	3.89	1.53	?	3.38
t	3.26	4.55	1.79	?	2.06
t	4.88	6.56	2.32	?	2.1
t	5.91	8.36	2.72	2.64	2.26
t	4.01	4.16	1.99	?	1.98
t	3.45	3.37	1.55	?	2.98
t	3.31	4.57	1.69	?	2.42
t	3.39	4.48	1.83	2.34	2.16
t	5.21	8.76	2.44	2.28	1.96
t	2.86	3.56	1.25	?	3.22
t	3.62	3.33	1.73	?	2.96
t	5.02	7.44	2.42	3.04	2.54
t	4.29	6.5	2.73	1.4	1.64
t	5.85	10.38	3.33	2.42	1.92
t	5.83	7.72	2.93	?	2.04
t	1.53	2.33	1.1	2.76	2.2
t	3.62	5.4	?	1.74	2.42
t	4.18	5.24	1.94	1.42	1.62
t	3.58	3.46	1.69	?	2.94
t	5.2	7.6	2.8	2	2
t	4.7	6	2	0	2.4
t	2.5	3.1	1.3	0	4
t	2.8	5.5	1.2	?	2
t	3.1	5.2	1.2	?	1.5
t	2.4	3.3	0.9	?	2
t	5.67	7.4	3.31	1.62	2.1
t	5.68	7.36	2.76	1.06	1.72
t	5.25	7.83	2.79	0.94	1.28
t	6.29	8.92	3.12	1	1.34
t	6.39	8.48	3.2	1.2	1.9
t	5.81	7.64	2.96	0.75	1.4
t	5.56	8.05	3.24	0.85	1.5
t	5.48	6.97	3.16	1.6	1.7
t	5.56	7.04	3.4	1.3	2
t	5.48	6.14	2.8	0.8	1.6
t	5.98	7.76	3.28	1.3	2
t	3.4	4.9	1.58	2.7	2.4
t	5.48	7.3	3.12	1.4	1.9
t	6.31	8.4	3.28	0.7	1.25
t	5.31	6.64	2.76	1.1	1.3
t	5.73	7.52	3.24	0.95	1.7
t	5.89	7.39	3.48	1	1.6
t	6.23	8.4	3.44	0.95	1.9
t	4.57	6.31	2.48	3	2
t	3.5	4.1	1.7	0	2.4
t	3.07	5.4	1.42	0	1.7
t	6.13	10.68	3.57	1.6	1.4
t	5.78	10.68	3.68	1	1.3
t	5.56	6.81	2.82	1.5	2
t	3.49	5.23	1.99	?	2.4
t	3.57	4.4	2.24	?	2.2
t	5.43	9.98	3.4	0.9	1.7
t	7	12.08	4.07	1.1	1.6
t	4.81	6.64	2.82	1.8	2.2
t	5.56	7.72		1.5	2
t	4.98	7.06	2.66	1.6	1.9
t	6.31	9.44	3.68	1.2	1.6
t	5.48	6.23	2.48	1.5	2.3
t	5.48	6.97	3.32	1.3	1.7
t	2.4	4.48	2	1.15	1.3
t	6.06	7.36	3.28	0.7	1.2
Pectinodon bakkeri	2.2	3	1	?	4
Pectinodon bakkeri	2.7	4.5	1	?	3.75
Pectinodon bakkeri	2.9	4.3	1.1	?	3.5
Pectinodon bakkeri	2.7	4.2	1.1	?	4
Pectinodon bakkeri	2.7	3.8	1	?	3.5
Pectinodon bakkeri	2.6	3.1	1	?	4.5
Pectinodon bakkeri	2.7	4.1	1	?	4
Pectinodon bakkeri	3	3.5	1	?	3
Pectinodon bakkeri	2.4	3.9	0.9	?	4
Pectinodon bakkeri	2	4.1	1	?	3
Pectinodon bakkeri	2.1	3.2	0.8	?	5
Pectinodon bakkeri	1.9	3.4	1.3	?	3
Pectinodon bakkeri	3.2	4	1	?	3
Pectinodon bakkeri	2.78	3.83	?	?	3.14
Pectinodon bakkeri	2.52	4.43	1.09	?	1.92
Pectinodon bakkeri	2.44	3.93	0.91	?	2.02
Pectinodon bakkeri	2.39	4.22	1	?	1.98
Pectinodon bakkeri	2.47	4.9	1.12	5.06	2.9
Pectinodon bakkeri	2.89	4.99	1.12	?	3.2
Pectinodon bakkeri	2.93	4.85	1.1	6.48	3.18
Pectinodon bakkeri	2.74	3.88	0.96	?	3.06
Pectinodon bakkeri	2.53	3.25	0.87	?	3.74
Pectinodon bakkeri	2.64	3.19	0.82	?	3.28
Pectinodon bakkeri	2.74	5.55	1.15	?	3.4
Pectinodon bakkeri	2.63	4.8	1.18	5.94	3.38
Pectinodon bakkeri	2.52	4.3	1.22	11.58	3.82
Pectinodon bakkeri	2.31	4.26	0.93	?	2
Pectinodon bakkeri	2.21	2.62	0.62	?	3.96
Pectinodon bakkeri	2.36	2.73	0.63	?	4.04
Pectinodon bakkeri	2.35	2.6	0.7	?	3.9
Pectinodon bakkeri	3.12	5.63	1.46	?	1.56
Pectinodon bakkeri	2.93	4.35	1.17	?	2.1
Pectinodon bakkeri	2.56	4.5	1.07	?	1.74
Pectinodon bakkeri	2.69	3.72	1.12	?	2.88
Pectinodon bakkeri	2.51	3.1	1.05	?	3.74
Pectinodon bakkeri	2.35	3.16		?	2.52
Pectinodon bakkeri	2.53	3.22	?	?	3.52
Pectinodon bakkeri	2.4	3.9	?	9.38	4.66
Pectinodon bakkeri	2.33	3.56	?	7.8	4.42
Pectinodon bakkeri	2.69	3.12	?	?	3.22
Pectinodon bakkeri	2	3	0.7	?	3.5
Pectinodon bakkeri	3.2	4.6	1.1	?	4
Pectinodon bakkeri	3.6	4.6	1.7	?	2.5
Pectinodon bakkeri	2.2	2.9	0.9	?	4
Pectinodon bakkeri	2.1	3	0.7	?	4.5
Aquilan cf. Richardoestesia gilmorei	2.24	2.88	0.98	8	6.5
Aquilan cf. Richardoestesia gilmorei	2.52	4.15	1.3	7	6
Aquilan cf. Richardoestesia gilmorei	2.32	3.4	1.28	?	5.4
Aquilan cf. Richardoestesia gilmorei	4.15	5.81	1.64	?	6.5
Aquilan cf. Richardoestesia gilmorei	3.49	5.56	1.88	?	5.6
Aquilan cf. Richardoestesia gilmorei	3.65	5.4	1.2	10.8	5.7
Aquilan cf. Richardoestesia gilmorei	2.04	2.52	0.92	10	6.5
Aquilan cf. Richardoestesia gilmorei	1.88	3.04	0.95	?	9
Aquilan cf. Richardoestesia gilmorei	2.48	2.8	1.04	?	10
Aquilan cf. Richardoestesia gilmorei	1.88	2.12	0.88	?	7
Aquilan cf. Richardoestesia gilmorei	2.48	3.28	1.08	9	7
Aquilan cf. Richardoestesia gilmorei	1.6	2.96	0.98	?	9
Aquilan cf. Richardoestesia gilmorei	2.12	2.52	0.94	?	7
Aquilan cf. Richardoestesia gilmorei	1.92	2.92	1	?	11
Aquilan cf. Richardoestesia gilmorei	2.2	2.56	0.8	?	8.5
Aquilan cf. Richardoestesia gilmorei	2.82	5.06	1.48	?	8
Aquilan cf. Richardoestesia gilmorei	2.4	3.24	1.1	?	9
Aquilan cf. Richardoestesia gilmorei	2.12	3.2	1.08	?	6.5
Aquilan cf. Richardoestesia gilmorei	3.98	4.73	2.02	?	7
Aquilan cf. Richardoestesia gilmorei	1.32	1.76	0.62	?	9
Aquilan cf. Richardoestesia gilmorei	1.76	2.76	0.78	?	10.3
Aquilan cf. Richardoestesia gilmorei	3.07	4.57	1.54	?	6.26
Aquilan cf. Richardoestesia gilmorei	2.52	3.82	1.36	?	9
Aquilan cf. Richardoestesia gilmorei	2.48	3.4	1.2	8.3	7
Aquilan cf. Richardoestesia gilmorei	4.32	6.56	1.24	8.5	6.5
Aquilan cf. Richardoestesia gilmorei	1.8	2.88	0.82	10	7
Aquilan cf. Richardoestesia gilmorei	2	2.96	1.02	?	7.6
Aquilan cf. Richardoestesia gilmorei	2.36	3.16	1.06	?	6.5
Aquilan cf. Richardoestesia gilmorei	2.8	4.9	1.74	?	7.2
Aquilan cf. Richardoestesia gilmorei	2.08	2.68	1.16	10.5	9
Aquilan cf. Richardoestesia gilmorei	2.36	2.68	0.92	9.8	7
Aquilan cf. Richardoestesia gilmorei	2.44	2.8	0.94	?	6.6
Aquilan cf. Richardoestesia gilmorei	2.16	4.07	1.48	?	5.8
Aquilan cf. Richardoestesia gilmorei	3.15	4.32	1.84	?	7.5
Aquilan cf. Richardoestesia gilmorei	3.57	4.73	1.92	9.1	6.7
Aquilan cf. Richardoestesia gilmorei	2.82	4.73	1.2	9	6.4
Aquilan cf. Richardoestesia gilmorei	3.24	4.65	1.72	?	7.5
Aquilan cf. Richardoestesia gilmorei	2.57	3.82	1.22	8	6.7
Aquilan cf. Richardoestesia gilmorei	1.96	2.96	0.82	?	10.1
Aquilan cf. Richardoestesia gilmorei	3.32	6.39	1.88	?	7.76
Aquilan cf. Richardoestesia gilmorei	2.16	2.57	0.92	8.8	6.4
Aquilan cf. Richardoestesia gilmorei	3.65	7.3	1.78	8.2	6.2
Aquilan cf. Richardoestesia gilmorei	2.91	4.15	1.42	10	7.7
Aquilan cf. Richardoestesia gilmorei	3.15	5.56	1.84	?	7.2
Aquilan cf. Richardoestesia gilmorei	2.56	3.44	1.22	?	7.7
Aquilan cf. Richardoestesia gilmorei	2.16	3.52	0.9	10	6.5
Aquilan cf. Richardoestesia gilmorei	2.4	3.24	0.94	11.4	10
Aquilan cf. Richardoestesia gilmorei	1.92	3.04	0.81	12	9.4
Aquilan cf. Richardoestesia gilmorei	1.68	2.4	1	?	6.3
Aquilan cf. Richardoestesia gilmorei	2.91	4.07	1.24	9	6.9
Aquilan cf. Richardoestesia gilmorei	2.2	3	1.04	?	6.7
Aquilan cf. Richardoestesia gilmorei	2.08	2.68	0.96	7.8	6.3
Aquilan cf. Richardoestesia gilmorei	2.53	3.74	0.92	?	7.5
Aquilan cf. Richardoestesia gilmorei	2.74	4.32	1.22	10.2	7.5
Aquilan cf. Richardoestesia gilmorei	2.52	3	1.12	?	8.2
Aquilan cf. Richardoestesia gilmorei	2.16	3.98	1.04	10.4	6.7
Aquilan cf. Richardoestesia gilmorei	2.6	2.68	0.86	9.6	8.1
Aquilan cf. Richardoestesia gilmorei	1.83	3.49	0.9	?	6.7
Aquilan cf. Richardoestesia gilmorei	3.32	4.23	1.3	7.5	5.9
Aquilan cf. Richardoestesia gilmorei	3.57	6.31	1.84	?	5.7
Aquilan cf. Richardoestesia gilmorei	1.91	2.91	1.06	9.5	6.5
Aquilan cf. Richardoestesia gilmorei	4.07	6.56	2.28	?	6.3
Aquilan cf. Richardoestesia gilmorei	1.91	3.49	0.86	9.6	6.7
Aquilan cf. Richardoestesia gilmorei	2.24	3.98	1.2	8	5.5
Aquilan cf. Richardoestesia gilmorei	2.16	3.9	1.16	?	7.4
Aquilan cf. Richardoestesia gilmorei	3.15	3.9	1.48	6.5	6.6
Aquilan cf. Richardoestesia gilmorei	2.41	3.82	1	8.2	6.5
Aquilan cf. Richardoestesia gilmorei	2.57	3.28	1.06	7	6
Aquilan cf. Richardoestesia gilmorei	2.28	3.12	1	9.4	7.7
Aquilan cf. Richardoestesia gilmorei	2.08	2.64	0.9	?	9.2
Aquilan cf. Richardoestesia gilmorei	2.44	2.8	1	7.4	6.4
Aquilan cf. Richardoestesia gilmorei	2.44	3.04	1.14	7.6	6.3
Aquilan cf. Richardoestesia gilmorei	2.52	3.36	0.96	7.3	7.2
Aquilan cf. Richardoestesia gilmorei	2.16	3	0.86	?	8
Aquilan cf. Richardoestesia gilmorei	2.48	3.04	0.92	?	9.8
Aquilan cf. Richardoestesia gilmorei	2.04	2.9	0.7	?	9
Aquilan cf. Richardoestesia gilmorei	1.96	2.8	0.98	?	11.2
Aquilan cf. Richardoestesia gilmorei	2.6	2.88	1.06	?	9
Aquilan cf. Richardoestesia gilmorei	1.68	1.88	1.04	?	8.8
Aquilan cf. Richardoestesia gilmorei	1.76	2.08	0.98	?	8.3
Aquilan cf. Richardoestesia gilmorei	1.68	2.1	0.82	?	10.2
Aquilan cf. Richardoestesia gilmorei	2.41	3.98	1.26	?	5.5
Aquilan cf. Richardoestesia gilmorei	2.24	4.48	1.44	?	5.9
Aquilan cf. Richardoestesia gilmorei	2.82	3.53	1.16	8.1	6
Aquilan cf. Richardoestesia gilmorei	1.8	2.12	0.96	?	8.5
Aquilan cf. Richardoestesia gilmorei	2	2.12	0.78	12	9
Aquilan cf. Richardoestesia gilmorei	3.65	5.73	1.36	?	6.4
Aquilan cf. Richardoestesia gilmorei	2.32	2.76	1.2	?	8.7
Aquilan cf. Richardoestesia gilmorei	2.68	3.44	1.36	9	9
Aquilan cf. Richardoestesia gilmorei	2.24	3.15	0.96	?	7.8
Aquilan cf. Richardoestesia gilmorei	3.65	6.1	1.44	8.8	6
Aquilan cf. Richardoestesia gilmorei	3.4	4.48	1.6	?	8.1
Aquilan cf. Richardoestesia gilmorei	3.2	4.73	1.56	?	7.6
Aquilan cf. Richardoestesia gilmorei	3.07	4.19	1.5	?	7.3
Aquilan cf. Richardoestesia gilmorei	2.74	3.9	1.24	?	5.7
Aquilan cf. Richardoestesia gilmorei	2.82	3.9	1.28	7.5	6.2
Aquilan cf. Richardoestesia gilmorei	3.4	3.74	1.6	?	7.9
Aquilan cf. Richardoestesia gilmorei	3.15	3.65	1.18	?	7.1
Aquilan cf. Richardoestesia gilmorei	2.91	3.78	1.06	8.8	6.8
Aquilan cf. Richardoestesia gilmorei	2.41	2.99	1.08	7.2	7.1
Aquilan cf. Richardoestesia gilmorei	2.74	3.4	1.18	?	6.5
Aquilan cf. Richardoestesia gilmorei	2.41	2.95	0.88	10.8	6.8
Aquilan cf. Richardoestesia gilmorei	2.24	2.99	1	10.6	7.6
Aquilan cf. Richardoestesia gilmorei	2.2	2.48	1	8	7.9
Aquilan cf. Richardoestesia gilmorei	2	2.38	0.92	?	8
Aquilan cf. Richardoestesia gilmorei	1.92	2.44	0.8	8.4	8.7
Aquilan cf. Richardoestesia gilmorei	3.15	3.98	1.66	?	8
Aquilan cf. Richardoestesia gilmorei	1.88	2.32	0.84	8.7	8.2
Aquilan cf. Richardoestesia gilmorei	2.8	3.6	1	9	7.5
Aquilan cf. Richardoestesia gilmorei	1.9	2.1	1.1	?	8
Aquilan cf. Richardoestesia gilmorei	2.4	3	1	?	9
Aquilan cf. Richardoestesia gilmorei	2.4	4.2	1.4	?	9.5
Aquilan cf. Richardoestesia gilmorei	2.4	3.1	1.1	10	9
Aquilan cf. Richardoestesia gilmorei	2.4	3.3	1.1	?	10
Aquilan cf. Richardoestesia gilmorei	3.5	5.2	1.4	10	6
Aquilan cf. Richardoestesia gilmorei	2.24	3.49	0.96	8	6.5
Aquilan cf. Richardoestesia gilmorei	2.49	3.65	1.45	?	6.6
Aquilan cf. Richardoestesia gilmorei	3.74	4.98	2.2	8	6.25
Aquilan cf. Richardoestesia gilmorei	2.91	5.06	1.44	?	5.6
Aquilan cf. Richardoestesia gilmorei	2.66	3.9	1.1	10	6.6
Aquilan cf. Richardoestesia gilmorei	3.24	4.9	1.48	?	8
Aquilan cf. Richardoestesia gilmorei	3.4	4.48	1.52	?	6.8
Aquilan cf. Richardoestesia gilmorei	3.2	5.4	1.7	?	5.5
Aquilan cf. Richardoestesia gilmorei	3.15	4.69	1.56	12	8.5
Aquilan cf. Richardoestesia gilmorei	2.82	4.32	1.38	?	8
Aquilan cf. Richardoestesia gilmorei	2.86	4.98	1.46	?	7
Aquilan cf. Richardoestesia gilmorei	2.66	4.9	1.44	?	8
Aquilan cf. Richardoestesia gilmorei	3.65	4.07	1.7	?	8
Aquilan cf. Richardoestesia gilmorei	3.15	3.98	1.54	?	8
Aquilan cf. Richardoestesia gilmorei	2.99	4.48	1.52	?	7.3
Aquilan cf. Richardoestesia gilmorei	3.24	5.48	1.68	?	7.5
Aquilan cf. Richardoestesia gilmorei	2.74	3.24	1.26	?	8.6
Aquilan cf. Richardoestesia gilmorei	2.49	4.36	1.4	?	8.5
Aquilan cf. Richardoestesia gilmorei	2.91	4.9	1.76	?	7.5
Aquilan cf. Richardoestesia gilmorei	2.6	3.5	0.9	8	7
Aquilan cf. Richardoestesia gilmorei	2.49	3.65	1.18	?	7.76
Aquilan cf. Richardoestesia gilmorei	2.32	3.12	0.88	?	8.3
Aquilan cf. Richardoestesia gilmorei	2.08	2.7	0.96	?	8
Aquilan cf. Richardoestesia gilmorei	1.96	3.24	0.94	?	8
Aquilan cf. Richardoestesia gilmorei	2.91	4.81	2.2	?	6.8
Aquilan cf. Richardoestesia gilmorei	3.74	5.4	1.94	9	6.7
Aquilan cf. Richardoestesia gilmorei	3.82	4.98	1.76	?	6.5
Aquilan cf. Richardoestesia gilmorei	3.4	4.98	1.42	10.4	6.2
Aquilan cf. Richardoestesia gilmorei	2.99	4.73	1.58	?	7.2
Aquilan cf. Richardoestesia gilmorei	5.64	5.06	1.62	?	8
Aquilan cf. Richardoestesia gilmorei	2.95	4.32	1.46	?	7.3
Aquilan cf. Richardoestesia gilmorei	2.82	3.4	1.32	?	6.3
Aquilan cf. Richardoestesia gilmorei	3.15	4.07	1.34	?	7.2
Aquilan cf. Richardoestesia gilmorei	2.41	3.61	1.16	9.2	6.5
Aquilan cf. Richardoestesia gilmorei	2.76	3.4	1.14	9	7.2
Aquilan cf. Richardoestesia gilmorei	2.28	3	0.96	8.5	6.2
Aquilan cf. Richardoestesia gilmorei	2.82	3.15	1.06	?	6.8
Aquilan cf. Richardoestesia gilmorei	2.08	3.28	1.46	?	9
Aquilan cf. Richardoestesia gilmorei	2.52	3.12	0.97	8.3	7.1
Aquilan cf. Richardoestesia gilmorei	2.32	3.28	0.98	?	7.8
