# Supplementary material for: New records of theropods from the latest Cretaceous of New Jersey and the Maastrichtian Appalachian fauna
Source: R Soc Open Sci. 2019 Nov 13;6(11):191206. doi: 10.1098/rsos.191206 (PMC6894593; doi:10.1098/rsos.191206)
Supplement: Smith et al. dataset [file rsos191206supp2.xlsx]

## Sheet: Sheet1
NAME				CBL	CBW	CH	AL			CA					DB	DC	DA
North Carolina Tooth				11.5	5.1	18	20			63.08					13	16	20
NJSM GP 22949				8	2	15.5	18			55.5					30	25	25
Gorgosaurus				12.4	11.6	25.53	25.99			81.52				15	12.8	11	12
Gorgosaurus				17.82	14.25	42.21	42.39			84.95				12	12	12.5	15.2
Gorgosaurus				21.28	10.77	39.68	45.91			84.03				12.5	11.5	11	12.8
Gorgosaurus				21.24	12.89	43.84	53.44			84.24				12.7	12.5	12	14.7
Gorgosaurus				19.96	13.56	43.31	44.01			85.02				11.5	12	14	14.2
Gorgosaurus				17.81	7.67	31.91	32.75			83.22					12	12.5	12
Gorgosaurus				18.48	11.41	37	41.35			83.66				14.3	13	13
Gorgosaurus				17.72	9.21	31.3	41.5			81.94						15
Gorgosaurus				13.69	8.83	22.19	24.9			79.76						14
Gorgosaurus				26.48	13.4	54.85	58.75			85.86				10	12	11.5	11
Gorgosaurus				20.55	10.57	40.31	36.92			85.21				14	12	11
Gorgosaurus				28.83	19.82	55.99	59.02			86.03				15	12	10	12.5
Gorgosaurus				26.37	17.7	44.57	51.28			84.81				14	13	10	12
Gorgosaurus				24.47	18.46	53.37	57.27			85.71				13	12	10	14
Daspletosaurus				27	22.63	74.78	80.86			86.79				13.8	12	11	12.8
Daspletosaurus				18.02	12.68	36.43	39.52			83.71						11.2	16.8
Daspletosaurus				22.88	17.81	52.62	56.49			85.62				12	10.8	10	11.8
Daspletosaurus				22.86	17.28	54.55	57.94			85.8					12.7	9.3	10
Daspletosaurus				22.53	16.63	49.57	49.81			85.7				12.8	12	9
Daspletosaurus				22.32	12.29	46.78	50.65			85.09					11	10	11
Daspletosaurus				19.19	12.17	34.93	35.69			83.82					12.8	11	11.1
Tyrannosaurus				42.86	28.35	72.67	80.21			86.9				12	9	11	13.7
Tyrannosaurus				37.34	22.82	65.11	70.53			86.56				13.8	9	10.4	13.1
Tyrannosaurus				33.72	24.44	55.11	56.72			86.09				14	8.6	10.8	13.7
Tyrannosaurus				46.05	33.78	91	93			87.62				12		7	11
Tyrannosaurus				39.29	31.25	78	79.5			87.23						9
Tyrannosaurus				38.23	27.07	75	76.5			87.11						8.5	6
Tyrannosaurus				35	26.6	65	67			86.66						9
Tyrannosaurus				31.5	21	55	56.5			86.07						8.5
Tyrannosaurus				36.06	24	63.65	71.97			86.38				12	8	7.1	10
Tyrannosaurus				45.46	32.63	94.06	108.36			87.43				12.9	8.6	7.5	11.2
Tyrannosaurus				39.41	27.18	75.75	86.34			86.88				11.5	8.3	8.3	11.4
Tyrannosaurus				38.56	26.2	72.55	83.44			86.75				12	9.1	8.8	11.6
Tyrannosaurus				44.86	32.6	91.12	101.55			87.43				8.2	7.2	7	9.8
Tyrannosaurus				47.69	37.58	105.26	117.64			87.73				11.5	7	7	10
Tyrannosaurus				46.74	37.21	108.82	122.99			87.76				13.3	8.3	7	10.6
Tyrannosaurus				35.65	23.48	61.04	71.65			86.16				11.8	8	9	12.3
Tyrannosaurus				27.86	18.18	45.96	49.9			85.15				13.7	9.7	10	15.8
Tyrannosaurus				18.96	13.2	29.72	32.17			82.55				14.8	10	12	13
Tyrannosaurus				40.76	24.51	75.03	81.29			87				12.9	9.5	7	9.4
Tyrannosaurus				26.47	19.13	44.29	47.71			84.98				14	9.3	10.5	13.5
Tyrannosaurus				52.07	32.67	87.42	95.97			87.43				11	7.5	6.5	11.8
Tyrannosaurus				48.74	33.94	88.87	93.94			87.51				10	8	7	10
Tyrannosaurus				40.21	27.37	78.09	84.19			87.1				11	8	9	11
Tyrannosaurus				34.49	25.71	66.25	74.66			86.47				14	7	8	11
Tyrannosaurus				34.69	24.51	63.57	66.84			86.53				14	9.8	9	13.8
Tyrannosaurus				45.88	34.97	93.68	98.79			87.62				9.8	6.8	7.7	9.9
Tyrannosaurus				51.98	34.23	102.21	108			87.81				10.5	6.6	7.2	8
Tyrannosaurus				48.63	33.03	115.3	118.82			88.09				10.7	6.8	8.2	8.2
Tyrannosaurus				49.71	29.58	103.42	110.83			87.81				9.5	8.4	8	11.2
Tyrannosaurus				48.15	31.47	94.89	99.43			87.67				13.7	8.2	7	10.2
Tyrannosaurus				38.48	27.2	73.7	79.43			86.93				6	4	4.5	10.8
Tyrannosaurus				29.25	19.01	48.55	56.35			85.01				12.8	8.1	10.2	10
Tyrannosaurus				32.08	21.86	55.34	56.57			86.11				12.6	9.5	9.9	12.3
Tyrannosaurus				21.25	14.57	31.96	32.14			83.34				15.2	10.9	14	14.7
Tyrannosaurus				40.19	23.64	66.28	69.94			86.7				14.3	8.9	9	11.8
Tyrannosaurus				26.23	18.32	45.17	46.31			85.22				10.4	8.8	8.9	10.5
Tyrannosaurus				40.66	26.36	71.99	78.02			86.89				9.4	8.4	8.2	9.4
Tyrannosaurus				46.2	32.7	94.97	96			86.89				11	7.5	7	7
Tyrannosaurus				46.28	31.88	89.01	90.85			87.56				8.6	8	7.7	10.4
Tyrannosaurus				37.65	27.74	62.01	66.1			86.44				9.4	8.4	8	9.6
Tyrannosaurus				33.38	23.15	50.54	53.48			85.65				11	9	9.4	13.4
Tyrannosaurus				30.62	21.42	46.83	50.62			85.29				11	9.1	9.2	10.9
Tyrannosaurus				28.05	20.44	41.56	45.04			84.71				12.8	9.2	10.4	13.5
Tyrannosaurus				15.01	9.22	15.85	17.41			76.45				16.1	15.4	15.7	16
Tyrannosaurus				45.89	32.17	77.74	78.96			87.25				10.3	9	7	11
Tyrannosaurus				33.12	24.75	54.12	56.48			85.98				13.8	9	10	14.9
Tyrannosaurus				23.64	16.61	30.34	33.09			82.84				13.8	11	10.9	12.9
Tyrannosaurus				18.52	13.56	21.91	24.25			80.12				15.9	13	14	14.9
Tyrannosaurus				27.38	14.27	44.22	50.21			84.85				11.4	10.5	9.9	12.7
Tyrannosaurus				34.87	21.75	58.66	60.01			86.33				12.5	10	9.8	12.2
Tyrannosaurus				31.75	18.04	50.14	56.28			85.51				9	11.2	8.5	8
Tyrannosaurus				30.05	19.03	52.8	53.94			85.92				10	10	8.7	11.5
Tyrannosaurus				29.84	16.45	42.55	50.21			84.59				11	10	9.6	11.6
Tyrannosaurus				30.94	19.46	45.42	58.26			84.83				11	10.5	9.5	11.5
Tyrannosaurus				29.93	16.94	43.64	54.33			84.7				9	11	8	8.9
Tyrannosaurus				31.86	21.18	54.62	60.01			85.87				9.2	11.2	8.9	10
Tyrannosaurus				38.89	31.57	85.47	93.14			87.28				8.7	7	8.4	10
Tyrannosaurus				41.46	30.59	103.98	109.25			87.81				10.3	8.9	7.8	10.3
Tyrannosaurus				48.6	31.17	102.44	104.79			87.87				12.1	7.8	7.5	12.3
Tyrannosaurus				38.37	24.42	77.64	88.33			86.99				11.1	8	7.4	11.4
Tyrannosaurus				40.01	25.31	79.7	84.23			87.32				10.4	8	7.4	11
Tyrannosaurus				37.54	26.05	82.14	84.04			87.35				10.3	9.1	8.3	10
Tyrannosaurus				25.92	16.46	37.57	42.72			84.05				11	10.5	10.5	14
Tyrannosaurus				50.01	33.93	104.06	115.51			87.75				10	7.5	8	10
Tyrannosaurus				49.49	34.82	100.89	103.67			87.84				10.5	7	6.5	8
Tyrannosaurus				36.77	28.68	81.6	88.33			87.16				8	6.5	7	11.5
Tyrannosaurus				47.17	32.77	117.06	120.69			88.11				11	6.5	7.5	8.5
Tyrannosaurus				46.68	36.68	108.53	116.36			87.88				11	7	6.7	10.5
Tyrannosaurus				43.6	27.5	87.85	105.7			87.18				11	7	8	11
Tyrannosaurus				42.51	26.68	91.27	103.51			87.37				11	7	7.8	10.7
Tyrannosaurus				30.97	20.17	51.14	57.92			85.4				9.5	9.3	8.5	10
Tyrannosaurus				48	33.14	105.46	116.94			87.76						7
Tyrannosaurus				22.5	12.83	32.08	39.31			82.87				12.5	7.5	9	11
Tyrannosaurus				44.9	32.89	105.61	115.88			87.75					7.5	6.7	9
Tyrannosaurus				42.37	28.11	96.28	98.9			87.72				10.5	8.5	7.5	9.1
Tyrannosaurus				40.22	28.37	82.23	93.04			87.11				10	8	7	10.5
Tyrannosaurus				39.1	26.46	74.66	80.16			86.99				12	8	9	15
Tyrannosaurus				34.77	25.6	68.24	75.89			86.59				10.3	8.1	7.5	11.4
Tyrannosaurus				30.92	20.59	55.57	63.53			85.81				12.5	9.5	8.5	12.8
Tyrannosaurus				46.11	30.97	99.03	109.1			87.64				9.2	7.8	7	8
Tyrannosaurus				42.34	30.87	86.64	87.83			87.52					10	8	11
Tyrannosaurus				51.1	38.04	92.07	104.05			87.49						9
Tyrannosaurus				46.93	35.35	82.01	87.03			87.31				11	9	10	10
Tyrannosaurus				41.69	31.29	70.93	78.07			86.82				11.5	8.8	8.5	11.9
Tyrannosaurus				21.5	16.32	34.05	37.1			83.47				12.5	12	13	11.8
Tyrannosaurus				25.56	18.09	35.01	40.02			83.66				12	12	11	11.8
Tyrannosaurus				48.46	37.48	97.52	102.32			87.73				12	10	7.5	11.2
Tyrannosaurus				47.34	37.21	96.12	100.54			87.7				13	12	9	11
Tyrannosaurus				39.08	28.71	68.04	72			86.76				11.5	9	11	16
Tyrannosaurus				30.2	23.9	51.94	62.75			85.41					8
Tyrannosaurus				40.46	28.55	76.12	86.28			86.93				15	9	7.7	10
Tyrannosaurus				38.87	33.12	65.23	79.88			86.35				12.3	8.5	7.5	11
Tyrannosaurus				32.59	26.99	56.6	62.74			85.99				12.5	9	8	11.5
Tyrannosaurus				30.49	22.12	45.63	52.6			85.05				12.5	9.5	9	12
Tyrannosaurus				23.98	16.12	32.38	37.07			83.16				13.5	9.5	10.5	12.5
Tyrannosaurus				18.37	10.35	22.51	26.85			80.21				13	12	14	16
Tyrannosaurus				34.2	21.3	60.68	68			86.22				12.5	9	9.5	12
Tyrannosaurus				42.1	25.8	88.82	92.44			87.51				8.5	8.5	8.5	12
Tyrannosaurus				38.1	23.9	73.35	86.7			86.7				12	9.5	10	12
Tyrannosaurus				42.1	28.9	76.02	87.89			86.91				9.5	10	8.5	14
Tyrannosaurus				16.2	11	17.75	19.9			77.86				16	12	14	19.5
Tyrannosaurus				46	33.7	79.09	88.18			87.12
Tyrannosaurus				54.5	34.4	117.1	138.9			87.87				8.5		8
Tyrannosaurus				47.8	32.6	100.5	110.9			87.68				10	9	10	12
Tyrannosaurus				38.8	27.4	68.93	77.65			86.5
Tyrannosaurus				47.1	35.1	87.99	107.4			87.22
Tyrannosaurus				47.6	33.9	96.94	102.2			87.7					8.5	7	10
Tyrannosaurus				37.2	27.1	60.98	71.93			86.05				10	9	8	11
Tyrannosaurus				41.2	28.5	85.3	96.94			87.2
Tyrannosaurus				20	15.9	21.78	27.29			80.06
Tyrannosaurus				45.4	35	83.09	94.84			87.19					9	10	13
Tyrannosaurus				42	30.5	71.36	78.29			86.85					9	9	16
Tyrannosaurus				41.3	33.5	72.95	88.32			86.71					9	10	17
Tyrannosaurus				28.8	19	48.26	54.52			85.27					10	13	16
Tyrannosaurus				19.1	14	27.02	34.25			81.45					11	14	17
Troodon				4.92	2.43	7.22	8.66			56.53				18.8	15	11.3	12.5
Troodon				6.22	2.95	9.61	10.25			66.58						10	12.5
Troodon				6	3.03	9.39	10.36			65.53				10	12.5	8.8	13.8
Troodon				5.6	2.71	8.47	8.94			63.39						12.5	10
Troodon				5.2	2.33	7.84	9.74			58.81				15	12.5	12.5	16.3
Troodon				4.45	1.62	7.25	7.36			59.04						12.5
Saurornithoides				3.58	2.68	5.01	6.92			34.94						15
Saurornithoides				3.66	2.69	5.51	7.79			39.64					12	10	12.5
Saurornithoides				4.31	2.45	5.61	7.37			45.04						10
Saurornithoides				3.8	2.48	6.45	8.47			48.08						15
Saurornithoides				4.09	2.51	6.4	7.16			52.26					12.5
Saurornithoides				3.76	2.26	6.23	7.97			47.35					12.5	12.5	17.5
Saurornithoides				2.98	2.5	4.28	5.25			21.14						10
Saurornithoides				4.09	2.61	6.33	6.57			53.46					10	10	11.8
Bambiraptor				2.37	1.41	5.33	7.28			22.1						25	25
Bambiraptor				2.34	1.41	5.01	6.53			20.95					20	25
Bambiraptor				2.08	1.4	4.82	5.25			31.88					30
Bambiraptor				2.37	1.61	4.91	6.83			11.89						30
Bambiraptor				2.47	1.24	5.58	6.39			39.74					24	30
Bambiraptor				2.61	1.41	5.99	7.13			41.83						25
Bambiraptor				2.35	1.2	5.86	6.86			39.8						24.2
Bambiraptor				2.54	0.99	4.62	5.14			30.01						32.5
Bambiraptor				3.22	1.37	5.66	6.95			41.88					35	23.7	32.5
Bambiraptor				2.15	1.57	4.03	4.39			10.74							25
Deinonychus				5.07	3	8.85	10.37			62.34					17.7	17.2	25
Deinonychus				7.07	3.2	10.07	12.31			66.71					22.3	17.5
Deinonychus				6.76	2.93	9.56	12.29			65.04				30	20	16.3	27.5
Deinonychus				6.74	2.8	9.14	11.78			64.12				28.5	24.3	17.8	23.8
Deinonychus				5.35	2.41	6.53	8.35			53.03				29.8	20.5	17.5	20.3
Deinonychus				7.15	3.23	11.01	13.5			68.35					17.5	17.5	17.5
Deinonychus				7.15	3.23	11.01	13.5			68.35					17.5	17.5	17.5
Deinonychus				6.36	3.07	10.4	12.1			67.24							17.5
Deinonychus				7.04	3.2	12.23	14.17			70.57					15	17.5	17.5
Deinonychus				7.13	4	13.58	16.14			71.87					20	15
Deinonychus				5.74	3.2	11.79	10.8			73.56					15	20	17.5
Deinonychus				6.11	2.58	8.77	13.7			60.88				29.8	27	17.3	16.8
Dromaeosaurus				7.21	4.06	12.86	15.8			70.76				15	18	17	19.5
Dromaeosaurus				6.84	3.7	11.58	13.97			69.08				15		20	15
Dromaeosaurus				7.64	4.02	12.38	16.37			69.92				15.8	22.5	17.5	17.5
Dromaeosaurus				6.28	3.13	10.68	12.4			67.66				8.8	20.7	20	15
Dromaeosaurus				6.69	3.32	10.98	12.89			68.39				15	20	17.5	16.3
Dromaeosaurus				5.7	3.11	9.7	11			65.64				17.5			22.5
Dromaeosaurus				5.46	4.03	9.4	10.5			64.99				17.5	25
Dromaeosaurus				6.09	3.81	11.55	12.34			70.23					21.3	15	15
Dromaeosaurus				6.47	3.91	11.22	13.1			68.66				15	18	17.5	19
Dromaeosaurus				6.56	3.89	11.27	12.99			68.96				15	18	17.5	19
Dromaeosaurus				5.56	3.27	8.52	10.7			61.27						17.5
Velociraptor				3.55	1.54	5.85	6.79			46.51					30
Velociraptor				3.3	1.54	4.38	5.88			23.87					30
Velociraptor				4.17	1.45	6.7	8.42			51.72				25	27.5	35
Velociraptor				4.35	2.15	7.91	9.54			57.85						30
Velociraptor				3.95	1.61	6.93	9.09			51.05					25	25	35
Velociraptor				3.11	1.13	4.69	0.8			35.07					27.5	30
Velociraptor				2.42	0.88	0.57	1.17			13.62					32.2	30
Velociraptor				4.69	1.55	0	1.98			64.86					21.3
Velociraptor				4.59	1.52	0	2			63.35					22.5	25
Velociraptor				4.47	1.5	0	2.79			57.08					25
Velociraptor				6.14	1.81	0	2.46			64.98					20	25	22.5
Velociraptor				5.99	1.79	0.01	2.4			64.66					25	20	35
Velociraptor				4.72	1.55	0	2.01			52.81						22.5	27.5
